1 **Understanding the factors influencing citizens' willingness-to-accept the use of insects to feed poultry, cattle, pig**  
2 **and fish in Brazil**

3 **Author 1**

4 Name: Carla Heloisa de Faria Domingues <sup>a</sup>

5 Family name: Domingues

6 Address: <sup>a</sup>Federal University of Grande Dourados, Rodovia Dourados – Itahum, Km 12, Dourados, Brazil.

7 E-mail: [carladomingues@ufgd.edu.br](mailto:carladomingues@ufgd.edu.br)

8 Telephone: +55 (67) 99250-6756

9 **Author 2**

10 Name: João Augusto Rossi Borges<sup>a</sup>

11 Family name: Borges

12 Address: <sup>a</sup>Federal University of Grande Dourados, Rodovia Dourados – Itahum, Km 12, Dourados, Brazil.

13 E-mail: [joaoborges@ufgd.edu.br](mailto:joaoborges@ufgd.edu.br)

14 Telephone: +55 (51) 997499180

15 **Author 3**

16 Name: Clandio Favarini Ruviano <sup>a</sup>

17 Family name: Ruviano

18 Address: <sup>a</sup>Federal University of Grande Dourados, Rodovia Dourados – Itahum, Km 12, Dourados, Brazil.

19 E-mail: [ClandioRuviano@ufgd.edu.br](mailto:ClandioRuviano@ufgd.edu.br)

20 Telephone: +55 (67) 99968-2047

21 **Author 4**

22 Name: Diego Gomes Freire Guidolin <sup>b</sup>

23 Family name: Guidolin

24 Address: <sup>b</sup>Anhanguera University - Uniderp – Alexandre Herculano, 1400, Campo Grande, Brazil.

25 E-mail: [dguidolin@hotmail.com](mailto:dguidolin@hotmail.com)

26 Telephone: +55 (67) 992835410

27 **Author 5**

28 Name: Juliana Rosa Mauad Carrijo <sup>a</sup>

29 Family name: Carrijo

30 Address: <sup>a</sup>Federal University of Grande Dourados, Rodovia Dourados – Itahum, Km 12, Dourados, Brazil.

31 E-mail: [julianacarrijo@ufgd.edu.br](mailto:julianacarrijo@ufgd.edu.br)

32 Telephone: +55 (67) 981223475

33 **Understanding the factors influencing citizens' willingness-to-accept the use of insects to feed poultry, cattle, pig**  
34 **and fish in Brazil**

35

36 **Abstract**

37 The increase in world's population will cause a high demand of animal-sourced food, which will require a boost in the  
38 production of protein, because protein is an important component of animal feed. A higher production of protein,  
39 however, might contribute for the depletion of environmental resources. In this scenario, the use of insects as an  
40 alternative source of protein to feed animals could be a solution. However, citizens' willingness-to-accept insect as a  
41 source of protein to feed animals is unknown, particularly in developing countries, such as Brazil. The aim of this study  
42 was to investigate the factors influencing citizens' willingness-to-accept the use of insects to feed poultry, cattle, pig  
43 and fish. To reach this aim, we conducted an online survey with Brazilian citizens. We analyzed the data using  
44 descriptive statistics and four logistic regression models. In each of logistic models, the dependent variable was  
45 citizens' willingness-to-accept the use of insects to feed either poultry, or cattle, or pig or fish. A set of independent  
46 variables including socio-demographic characteristics, attitudes, perceived benefits, perceived risks, and perceived  
47 concerns were used to explain citizens' willingness-to-accept the use of insect to feed animals. Results showed that  
48 most citizens would accept that poultry, pig, and fish receive insect-based diets, and half of the citizens would accept  
49 and half would not accept that cattle receive such diet. Results of the logistic regression models showed that citizens  
50 who had a positive attitude about using insects to feed animals were more willing-to-accept the use of insect to feed  
51 poultry, cattle, pig, and fish compared to those who had a negative attitude. Citizens who perceived the benefits of using  
52 insect to feed animals were less willing-to-accept the use of insects to feed poultry compared to those who didn't  
53 perceive the benefits. Citizens who perceived the benefits of using insects to feed animals were more willing-to-accept  
54 the use of insect to feed fish compared to those who didn't perceive the benefits. Citizens who were more concerned  
55 about using insect to feed animals were more willing-to-accept the use of insects to feed poultry compared to those who  
56 were less concerned. Finally, citizens who were more concerned about using insects to feed animals were less willing-  
57 to-accept the use of insect to feed pigs compared to those who were less concerned. These results revealed important  
58 insights that can be used to design strategies to increase the acceptance of the use of insects to feed poultry, cattle, pig,  
59 and fish.

60 **Keywords:** acceptance; consumer; livestock; sustainability.

61

62

63

## 64 **1. Introduction**

65           The increase in world's population will cause a high demand of animal-sourced food, which will require a  
66 boost in the production of protein, because protein is an important component of animal feed (Van Huis, A., 2013). A  
67 higher production of protein, however, might contribute for the depletion of environmental resources (Verbeke, 2015).  
68 Furthermore, protein is one of the most expensive and limiting ingredient to feed animals (Kim et al., 2019; Llagostera  
69 et al., 2019). In this scenario, the use of insects as an alternative source of protein to feed animals could be a solution,  
70 because its high nutritional value, high level of protein, low level of greenhouse gases emissions, and the little amount  
71 of water necessary to produce insects compared to common crops (Van Huis et al., 2013; Hartmann, 2015; Verbeke et  
72 al., 2015; Alegretti, 2018; Llagostera et al., 2019). Brazil is one of the main producers and exporters of animal-sourced  
73 food and feed protein supplier in the world, and most of the protein used to feed animals comes from common sources  
74 (i.e. soybean) (Ruviaro et al., 2014). Therefore, if the world wants to succeed in the implementation of the use of insects  
75 as a feed ingredient, Brazil plays an important role. However, despite the potential of the use of insects as alternative  
76 source of protein to feed animals, the edible insect sector is facing challenges, which include consumer acceptance  
77 (Rumpold and Schüter, 2013a). In Brazil, to the best of our knowledge, this is the first research to focus on citizens'  
78 willingness-to accept the use of insects as an alternative source of protein to feed animals.

79           Previous literature has found that, in general, humans avoid unfamiliar foods (i.e. Neophobia),  
80 particularly from animal origin (Martins and Pliner, 2005; Van Huis et al., 2013). Such fact per se imposes a challenge  
81 for citizens' acceptance of insects as food and as animal feed. The implementation of insects as food and feed is  
82 particularly challenging in Western cultures, because citizens neither consider insects as food nor consider insects  
83 appropriate for consumption (Tan et al., 2016). Previous research conducted in Western and Eastern cultures has  
84 focused on consumers' willingness to substitute meat by insects (Schösler et al., 2012; Vanhonacker et al., 2013;  
85 Verbeke, 2015; Hartman et al., 2015; Tan et al., 2015; Gere et al., 2017; Hartman and Siegrist, 2017). Although we  
86 acknowledge the contribution of such studies, we concurred with other authors that argue that insects could be easier  
87 introduced in citizens' daily diet by developing products that are currently consumed (Fisher and Frewer, 2009; Tan et  
88 al. 2016; Kim, 2019) or by using insects in animal feed.

89           Studies about consumer preferences and barriers for using insects to feed animals are scanty (Van Huis, 2013;  
90 Sogari et al., 2019). Verbeke et al. (2015), in a research conducted in Belgium, investigated citizens' acceptance of  
91 using insects in animal feed. Their results showed that the use of insects to feed fish and poultry was widely accepted.  
92 In the same study, Verbeke et al. (2015) found that citizens have a more critical attitude towards the use of insects to  
93 feed cattle, either for milk or beef.

94           In the light of the foregoing, the aim of this study was to investigate the factors influencing citizens'  
95 willingness-to-accept the use of insects to feed poultry, cattle, pig and fish. Such factors include citizens' attitudes

96 towards the use of insect to feed animals, perceived benefits, perceived risks and perceived concerns about the use of  
97 insects to feed animals, and socio-demographic characteristics. We believe that such a research could provide insights  
98 to policy makers and private companies that can be used to develop strategies to increase the acceptance of the use of  
99 insects to feed poultry, cattle, pig, and fish.

## 100 **2. Material and methods**

### 101 *2.1 Survey and sampling*

102 We developed four similar questionnaires. Each questionnaire focuses in a specific specie (i.e. poultry, cattle,  
103 pig, and fish). The questionnaires consisted of four groups of questions adapted from Verbeke et al. (2015). In the first  
104 group, we measured socio-demographic characteristics (i.e. gender, age, income, educational level, local of residence  
105 and region). We also measured previous contact with the specific specie. In the same group of questions, we measured  
106 willingness-to-accept the use of insects to feed animals in a binary response '0 = no', '1 = yes'. All these variables are  
107 presented in Table A1.

108 In the second group, we measured general attitudes towards rearing insects instead of crops to use in animal  
109 feed, and of using insects as an ingredient in animal feed (see Table A2; Attitude 1 - 8). To measure these questions, we  
110 used a five-point semantic differential scales with four items each, namely 'bad-good', 'negative-positive', 'uneasy-  
111 easy' and 'not satisfied-satisfied'. Next, we used statements to measure attitudes towards using insects to feed specific  
112 species (poultry, cattle, pig, and fish) (see Table A2; Attitude 9 - 12). These statements were measured using five-point  
113 semantic differential scales with four response items per specie, namely 'not meaningful-meaningful', 'not desirable-  
114 desirable', 'not feasible-feasible' and 'not acceptable-acceptable'.

115 In the third group, we used statements to measure perceptions related to five possible benefits and seven  
116 possible risks about the use of insects to feed animals (see Table A3). These statements were measured on a five-point  
117 Likert scale with response categories '1 = totally disagree', '2 = disagree', '3 = neither agree nor disagree', '4 = agree',  
118 and '5 = totally agree'.

119 In the fourth group, we used statements to measure concerns or challenges about the use of insects to feed  
120 animals (see Table A4). These statements, were measured in a five-point Likert scale with response categories '1 = not  
121 concerned at all', '2 = rather not concerned', '3 = neither, nor', '4 = rather concerned', and '5 = very much concerned'.  
122 The survey was extensively pre-tested and refined prior to administration. All the questions were translated to  
123 Portuguese.

124 To collect the data, we conducted an anonymous online survey. The survey was distributed in all regions of  
125 Brazil. Sampling and the application of the survey were performed with the support of a specialized market research  
126 company. To ensure the necessary level of rigor, we monitored and commented on each step of the sampling and survey  
127 implementation. A total of 600 questionnaires were collected, 150 for each of the four species. Therefore, we had a

128 sample of 150 participants for each questionnaire. The data collection took place in March 2018.

## 129 *2.2 Statistical analysis*

130 Prior to the analysis, the reliability of the scales used to measure attitudes, perceived benefits, perceived risks,  
131 and perceived concerns were investigated using Cronbach's  $\alpha$  coefficient. Cronbach's  $\alpha$  coefficients higher than 0.7  
132 indicate that there is a high degree of internal reliability among the items measuring each of these factors (Hair et al.,  
133 2010).

134 Statistical analysis was conducted in two steps. In a first step, we used factor analysis to reduce the number of  
135 items used to represent citizens' attitudes, citizen's perceived benefits, citizens' perceived risks, and citizens' perceived  
136 concerns about the use of animals to feed animals. Principal component was used as the extraction method. The  
137 criterion to define the number of factors was an eigenvalue greater than one (Hair et al., 2010). Items were included in a  
138 factor when they presented factor loadings greater than 0.5. Factors scores were generated for subsequent analysis (Hair  
139 et al., 2010).

140 In a second step, we run four logistic regression models. The dependent variable was citizens' willingness-to-  
141 accept the use of insects to feed animals. We tested the impact of five groups of independent variables: socio-  
142 demographic characteristics, attitudes, perceived benefits, perceived risks, perceived concerns about the use of insects  
143 to feed animals. The significance level was  $p < 0.05$ . We assessed multicollinearity by running multiple regressions, each  
144 with a different item as the dependent variable and all the rest of the items as independent variables, and then checking  
145 the tolerance and variance inflation factor (VIF) (Kline, 2011). We found high multicollinearity between the items that  
146 measured general attitudes and the variables that measured attitudes towards specific specie. Thus, we decided to  
147 maintain in the analysis only the variables that measure attitudes towards using insects to feed specific species

148

## 149 **3. Results**

### 150 *3.1 Descriptive statistics*

151 Descriptive statistics are presented in Table 1. In the four questionnaires, socio-demographic characteristics of  
152 the samples were similar except for gender, income, and type of contact with the specific specie. In the poultry and fish  
153 questionnaires, the majority of respondents were males. The samples in the poultry and cattle questionnaires had a  
154 lower income compared to the samples in the pig and fish questionnaires. The type of contact with the different specie  
155 was similar between poultry and fish questionnaires and between cattle and pig questionnaires. Results showed that  
156 most citizens would accept that poultry, pig, and fish receive insect-based diets, and half of the citizens would accept  
157 and half would not accept that cattle receive such diet.

158

159

160 Table 1 – Descriptive statistics of the socio-demographic and ‘willingness to accept’ variables used in the  
161 questionnaires.

| Variables                                                                                                                                                                                                                                                                                                                                                                                                | Poultry supply chain (%)<br>(n=150)                              | Cattle supply chain (%)<br>(n=150)                            | Pig supply chain (%)<br>(n=150)                                 | Fish supply chain (%)<br>(n=150)                                    |
|----------------------------------------------------------------------------------------------------------------------------------------------------------------------------------------------------------------------------------------------------------------------------------------------------------------------------------------------------------------------------------------------------------|------------------------------------------------------------------|---------------------------------------------------------------|-----------------------------------------------------------------|---------------------------------------------------------------------|
| Age (years) (mean and standard deviation in brackets)                                                                                                                                                                                                                                                                                                                                                    | 33 (1.02)                                                        | 34 (1.07)                                                     | 33 (1)                                                          | 35 (1.05)                                                           |
| Gender (1: male; 2: female)                                                                                                                                                                                                                                                                                                                                                                              | 1: 52.67; 2: 47.33                                               | 1: 42.67; 2: 57.33                                            | 1: 48; 2: 52                                                    | 1: 52; 2: 48                                                        |
| Income (1: more than R\$14.970,00; 2: R\$4.990,00 – R\$14.970,00; 3: R\$2.994,00 – R\$4.970,00; 4: R\$998,00 – R\$2.994,00; 5: R\$998,00)                                                                                                                                                                                                                                                                | 1: 2; 2: 16; 3: 32; 4: 30.67; 5: 19.33                           | 1: 2.67; 2: 16; 3: 29.33; 4: 32.67; 5: 19.33                  | 1: 2; 2: 21.33; 3: 28.67; 4: 26.67; 5: 21.33                    | 1: 2; 2: 20; 3: 34.67; 4: 24.67; 5: 16.67                           |
| Educational level (1:incomplete elementary school; 2:complete elementary school; 3:incomplete high school; 4:complete high school; 5:incomplete bachelor degree; 6:complete bachelor degree; 7:incomplete postgraduate studies; 8:complete postgraduate studies)                                                                                                                                         | 1: 4; 2: 3.33; 3: 8; 4: 41.33; 5: 21.33; 6: 14.67; 7: 1.33; 8: 6 | 1: 4; 2: 5.33; 3: 7.33; 4: 36; 5: 22; 6: 14.67; 7: 2; 8: 8.67 | 1: 4; 2: 2; 3: 10; 4: 33.33; 5: 18.67; 6: 20; 7: 1.33; 8: 10.67 | 1: 5.33; 2: 2; 3: 6.67; 4: 34.67; 5: 16.67; 6: 25.33; 7: 2; 8: 7.33 |
| Local of residence (1: urban; 2:rural; 3:both)                                                                                                                                                                                                                                                                                                                                                           | 1: 89.33; 2: 4.67; 3:6                                           | 1: 80.67; 2: 4.67; 3: 14.67                                   | 1: 86.67; 2: 0.67; 3:12.67                                      | 1: 86.67; 2: 2.67; 3: 10.67                                         |
| Region (0: south and southeast; 1: Midwest, northeast and north)                                                                                                                                                                                                                                                                                                                                         | 0: 60.67; 1: 39.33                                               | 0: 60; 1: 40                                                  | 0: 58; 1: 42                                                    | 0: 54.67; 1: 45.33                                                  |
| Contact with the animal supply chain (0: no; 1: yes)                                                                                                                                                                                                                                                                                                                                                     | 0: 34.67; 1: 65.33                                               | 0: 46.67; 1: 53.33                                            | 0: 38; 1: 62                                                    | 0: 10.67; 1: 89.33                                                  |
| Type of contact with the animal supply chain (1: I lived in a rural propriety that produced broilers <sup>a</sup> ; 2: Someone in the family had or has a rural property that produces broiler <sup>a</sup> ; 3: I visited rural properties that produced broilers <sup>a</sup> , but I never had direct contact with these animals; 4: I work or worked in poultry <sup>a</sup> supply chain; 5: other) | 1: 12.24; 2: 27.55; 3: 32.65; 4: 7.14; 5: 20.41                  | 1: 12.50; 2: 46.25; 3: 23.75; 4: 8.75; 5: 8.75                | 1: 12.90; 2: 49.46; 3: 27.96; 4: 1.08; 5: 8.6                   | 1: 7.46; 2: 24.63; 3: 35.82; 4: 3.73; 5: 28.36                      |
| Willingness to accept the use of insects in poultry <sup>a</sup> feed (0: no; 1: yes)                                                                                                                                                                                                                                                                                                                    | 0: 44.67; 1: 55.33                                               | 0: 50; 1: 50                                                  | 0: 44.67; 1: 55.33                                              | 0: 24.67; 1: 75.33                                                  |

162 <sup>a</sup> The words ‘poultry or broiler’ was replaced by the word ‘beef or cattle’ in the beef questionnaire, by the word ‘pig  
163 or pork’ in the pig questionnaire and by the word ‘fish’ in the fish questionnaire.

### 164 3.2 Cronbach alpha values

165 The Cronbach alpha coefficients for the items measuring attitudes ranged between from 0.83 and 0.92. The  
166 Cronbach alpha for the items measuring possible benefits ranged from 0.85 to 0.91, and for the items measuring  
167 possible risks from 0.80 0.86. The Cronbach alpha measuring concerns ranged from 0.92 to 0.93. These results  
168 indicated that there is a high degree of internal reliability among the items measuring each of these factors.

### 169 3.3 Factor analysis

170 Results of factor analysis showed an eigenvalue above 1.0 for the items measuring attitude, perceived benefits,  
171 perceived risks, and perceived concerns. The same pattern occurred in the analysis of the data from the four  
172 questionnaires. We decided to remove one item measuring perceived risk due to its cross factor loading. The item was  
173 excluded from the analysis of the data of the four questionnaires. The item was ‘The use of insect-based meal in animal  
174 feed can increase competitiveness with other agricultural activities’.

175 Adapted from Verbeke et al. (2015), we created one factor to represent ‘Attitude’ (Att), one factor to represent  
176 ‘Perceived benefits’ (PB), one factor to represent ‘Perceived risks’ (PR), and one factor to represent ‘Perceived  
177 concerns’ (PC) about the use of insects to feed poultry, cattle, pig and fish. The items measuring attitudes were  
178 positively formulated in the questionnaire, so the higher respondents score on these items the more positive were their  
179 attitudes towards the use of insects to feed poultry, pig, cattle, and fish. The items measuring perceived benefits were  
180 positively formulated, so the higher the respondents score on these items the more they agree that the use of insect to  
181 feed animals would benefit the animal supply chain. The items measuring perceived risks were positively formulated,  
182 so the higher respondents score on perceived risks the more they agree that the use insects to feed animals would be  
183 risky for the animal supply chain. The items measuring perceived concerns were positively formulated, so the higher  
184 respondents score on perceived concerns the more they agree that there are concerns about the use insects to feed  
185 animals.

186 Descriptive statistics of the statements used to measure attitudes, perceived benefits, perceived risks and,  
187 perceived concerns are presented in Table 2, Table 3 and Table 4, respectively. For the statements measuring attitudes  
188 towards the use of insects to feed poultry, cattle, pig, and fish (Table 2, Att 9 to Att 12), the means were below or close  
189 to 3, which indicates that respondents have a neutral attitude. For the statements measuring perceived benefits and  
190 perceived risks about the use of insects to feed poultry, cattle, pig, and fish (Table 3, PB1 to PB5; PR1 to PR7), the  
191 means were a little above or close to 3 which indicates that individuals were neutral about the possible benefits and  
192 possible risks. For the statements measuring perceived concerns about the use of insects to feed poultry, cattle, pig, and  
193 fish (Table 4, C1 to C10), the means were a little above to 3, which indicates that individuals were neutral about it.

194

195

196

Table 2 – Descriptive statistics of attitude items used in the questionnaires.

| Items  | Statements/Scales                                                                            | Poultry supply chain (n=150)<br>Mean (SD) | Cattle supply chain (n=150)<br>Mean (SD) | Pig supply chain (n=150)<br>Mean (SD) | Fish supply chain (n=150)<br>Mean (SD) |
|--------|----------------------------------------------------------------------------------------------|-------------------------------------------|------------------------------------------|---------------------------------------|----------------------------------------|
|        | What do you think of the idea of producing insects instead of grains for use in animal feed? |                                           |                                          |                                       |                                        |
| Att 1  | 1:negative; 5:positive                                                                       | 2.72 (0.10)                               | 2.56 (0.10)                              | 2.70 (0.10)                           | 3 (0.11)                               |
| Att 2  | 1:bad; 5:good                                                                                | 2.74 (0.11)                               | 2.50 (0.10)                              | 2.63 (0.11)                           | 3.16 (0.11)                            |
| Att 3  | 1:uneasy; 5:easy                                                                             | 2.76 (0.12)                               | 2.50 (0.11)                              | 2.66 (0.11)                           | 2.86 (0.10)                            |
| Att 4  | 1:not satisfied;<br>5:satisfied                                                              | 2.68 (0.11)                               | 2.40 (0.10)                              | 2.52 (0.10)                           | 2.97 (0.10)                            |
|        | What do you think of the idea of using insects as ingredient in animal feed?                 |                                           |                                          |                                       |                                        |
| Att 5  | 1:negative; 5:positive                                                                       | 2.88 (0.11)                               | 2.71 (0.11)                              | 2.69 (0.11)                           | 3.08 (0.11)                            |
| Att 6  | 1:bad; 5:good                                                                                | 2.84 (0.11)                               | 2.58 (0.11)                              | 2.75 (0.11)                           | 3.17 (0.11)                            |
| Att 7  | 1:uneasy; 5:easy                                                                             | 2.71 (0.10)                               | 2.62 (0.11)                              | 2.74 (0.11)                           | 3.11 (0.11)                            |
| Att 8  | 1:not satisfied;<br>5:satisfied                                                              | 2.82 (0.12)                               | 2.56 (0.10)                              | 2.63 (0.10)                           | 3.08 (0.11)                            |
|        | What do you think of the idea of using insects in poultry <sup>a</sup> feed?                 |                                           |                                          |                                       |                                        |
| Att 9  | 1:negative; 5:positive                                                                       | 2.82 (0.12)                               | 2.62 (0.11)                              | 2.77 (0.11)                           | 3.44 (0.12)                            |
| Att 10 | 1:bad; 5:good                                                                                | 2.90 (0.11)                               | 2.70 (0.12)                              | 2.95 (0.12)                           | 3.46 (0.12)                            |
| Att 11 | 1:uneasy; 5:easy                                                                             | 2.9 (0.12)                                | 2.59 (0.11)                              | 2.66 (0.11)                           | 3.39 (0.11)                            |
| Att 12 | 1:not satisfied;<br>5:satisfied                                                              | 2.83 (0.12)                               | 2.53 (0.11)                              | 2.74 (0.11)                           | 3.26 (0.11)                            |

197

<sup>a</sup> The words ‘poultry or broiler’ was replaced by the word ‘beef or cattle’ in the beef questionnaire, by the word ‘pig

198

or pork’ in the pig questionnaire and by the word ‘fish’ in the fish questionnaire.

199

200

201

202

203

204

205

206

207



208 Table 3 – Descriptive statistics of perception items used in the questionnaires.

| Items    | Statements <sup>a</sup>                                                      | Poultry supply chain (n=150)<br>Mean (SD) | Cattle supply chain (n=150)<br>Mean (SD) | Pig supply chain (n=150)<br>Mean (SD) | Fish supply chain (n=150)<br>Mean (SD) |
|----------|------------------------------------------------------------------------------|-------------------------------------------|------------------------------------------|---------------------------------------|----------------------------------------|
| Benefits | The use of insect in poultry <sup>b</sup> feed...                            |                                           |                                          |                                       |                                        |
| PB1      | Could allow organic waste to be better valorized                             | 3.02 (0.11)                               | 2.64 (0.11)                              | 2.93 (0.11)                           | 3.35 (0.10)                            |
| PB2      | Could allow sustainability to be improved                                    | 3.02 (0.11)                               | 2.84 (0.11)                              | 2.93 (0.11)                           | 3.46 (0.11)                            |
| PB3      | Could allow the production of enough food to world population                | 2.86 (0.11)                               | 2.63 (0.11)                              | 2.79 (0.11)                           | 3.23 (0.10)                            |
| PB4      | May reduce the price of feed and animal production                           | 3.25 (0.11)                               | 3.07 (0.11)                              | 3.18 (0.11)                           | 3.42 (0.10)                            |
| PB5      | Can improve society's acceptance of poultry production                       | 2.54 (0.10)                               | 2.32 (0.10)                              | 2.50 (0.10)                           | 2.99 (0.10)                            |
| Risks    | The use of insect in poultry <sup>b</sup> feed...                            |                                           |                                          |                                       |                                        |
| PR1      | May cause allergic reactions in humans                                       | 2.83 (0.12)                               | 3.02 (0.11)                              | 3.08 (0.11)                           | 2.68 (0.10)                            |
| PR2      | May cause allergic reactions in animals                                      | 3.32 (0.11)                               | 3.42 (0.11)                              | 3.29 (0.11)                           | 3.42 (0.10)                            |
| PR3      | Can impact on biodiversity if the insects are accidentally released          | 2.97 (0.11)                               | 3.18 (0.11)                              | 3.32 (0.10)                           | 3.09 (0.11)                            |
| PR4      | May introduce microbiological contamination in food supply chain             | 2.94 (0.11)                               | 3.02 (0.11)                              | 3.16 (0.11)                           | 2.82 (0.11)                            |
| PR5      | Can increase competitiveness with other agricultural activities              | 2.93 (0.10)                               | 2.83 (0.11)                              | 3.04 (0.11)                           | 3.08 (0.10)                            |
| PR6      | May reduce the consumers acceptance of food resulting from animal production | 3.14 (0.10)                               | 3.35 (0.11)                              | 3.35 (0.11)                           | 3.18 (0.10)                            |
| PR7      | Can introduce chemical residues into the food supply chain                   | 2.74 (0.11)                               | 3.11 (0.11)                              | 3.04 (0.11)                           | 2.83 (0.10)                            |

209 <sup>a</sup> All the statements were measured using a Likert-type scale (1:strongly disagree; 2:disagree; 3:neutral; 4:agree; 5:strongly agree); <sup>b</sup>

210 The words 'poultry or broiler' was replaced by the word 'beef or cattle' in the beef questionnaire, by the word 'pig or pork' in the pig  
211 questionnaire and by the word 'fish' in the fish questionnaire.

212

213

214

215

216

217

218

219

220 Table 4 – Descriptive statistics of concerns items used in the questionnaires.

| Items    | Statements <sup>a</sup>                                                                             | Poultry supply chain (n=150)<br>Mean (SD) | Cattle supply chain (n=150)<br>Mean (SD) | Pig supply chain (n=150)<br>Mean (SD) | Fish supply chain (n=150)<br>Mean (SD) |
|----------|-----------------------------------------------------------------------------------------------------|-------------------------------------------|------------------------------------------|---------------------------------------|----------------------------------------|
| Concerns | To what extent do you concern about...                                                              |                                           |                                          |                                       |                                        |
| C1       | ...consumer acceptance when insects are used in poultry <sup>a</sup> feed?                          | 3.46 (0.10)                               | 3.46 (0.11)                              | 3.42 (0.10)                           | 3.05 (0.10)                            |
| C2       | ...legislation when insects are used in poultry <sup>a</sup> feed?                                  | 3.53 (0.10)                               | 3.58 (0.11)                              | 3.66 (0.10)                           | 3.22 (0.11)                            |
| C3       | ...the communication with consumers when insects are used in poultry <sup>a</sup> feed?             | 3.70 (0.10)                               | 3.76 (0.10)                              | 3.73 (0.10)                           | 3.42 (0.10)                            |
| C4       | ...the communication with farmers when insects are used in poultry <sup>a</sup> feed?               | 3.54 (0.10)                               | 3.76 (0.10)                              | 3.66 (0.10)                           | 3.28 (0.10)                            |
| C5       | ...sanitary policy and inspection when insects are used in poultry <sup>a</sup> feed?               | 4.16 (0.09)                               | 4.05 (0.10)                              | 4.10 (0.09)                           | 3.64 (0.10)                            |
| C6       | ...food packaging when insects are used in poultry <sup>a</sup> feed?                               | 3.76 (0.10)                               | 3.78 (0.11)                              | 3.66 (0.10)                           | 3.42 (0.10)                            |
| C7       | ...ensuring enough insects to supply the demand when insects are used in poultry <sup>a</sup> feed? | 3.56 (0.10)                               | 3.42 (0.11)                              | 3.51 (0.10)                           | 3.32 (0.11)                            |
| C8       | ...how insects will be reared when they are used in poultry <sup>a</sup> feed?                      | 3.84 (0.10)                               | 3.99 (0.10)                              | 3.84 (0.10)                           | 3.90 (0.10)                            |
| C9       | ...how insects will be processed when they are used in poultry <sup>a</sup> feed?                   | 3.82 (0.10)                               | 3.93 (0.10)                              | 3.78 (0.10)                           | 3.74 (0.10)                            |
| C10      | ...feed quality when insects are used in poultry <sup>a</sup> feed?                                 | 3.97 (0.09)                               | 3.96 (0.10)                              | 3.92 (0.09)                           | 3.70 (0.11)                            |

221 <sup>a</sup> All the statements were measured using a Likert-type scale (1: not concern at all; 2: rather not concerned; 3:neither  
 222 agree nor disagree, 4: rather concerned, and 5: very much concerned); <sup>b</sup> The words ‘poultry or broiler’ was replaced  
 223 by the word ‘beef or cattle’ in the beef questionnaire, by the word ‘pig or pork’ in the pig questionnaire and by the  
 224 word ‘fish’ in the fish questionnaire.

### 225 3.4 Logistic regression models

226 We tested whether socio-demographic characteristics, attitudes, perceived benefits, perceived risks, and  
 227 perceived concerns would impact on citizens’ willingness-to-accept the use of insects to feed poultry, cattle, pig and  
 228 fish. Results of the four logistic models are present in Table 5.

229

Table 5 – Logistic regression models of the willingness-to-accept the use of insects in feed for poultry, cattle, pig and fish supply chains.

| Independent variables                                                    | Willingness-to-accept the use of insects in feed for poultry |       |         | Willingness-to-accept the use of insects in feed for cattle |       |         | Willingness-to-accept the use of insects in feed for pig |       |         | Willingness-to-accept the use of insects in feed for fish |       |         |
|--------------------------------------------------------------------------|--------------------------------------------------------------|-------|---------|-------------------------------------------------------------|-------|---------|----------------------------------------------------------|-------|---------|-----------------------------------------------------------|-------|---------|
|                                                                          | B                                                            | S.E.  | Exp (B) | B                                                           | S.E.  | Exp (B) | B                                                        | S.E.  | Exp (B) | B                                                         | S.E.  | Exp (B) |
| Age                                                                      | -0.036                                                       | 0.027 | 0.963   | 0.020                                                       | 0.024 | 1.021   | 0.029                                                    | 0.023 | 1.029   | -0.110*                                                   | 0.054 | 0.895   |
| Gender                                                                   | -1.553                                                       | 0.827 | 0.211   | -0.078                                                      | 0.633 | 0.924   | 0.399                                                    | 0.538 | 1.490   | -1.172                                                    | 1.136 | 0.309   |
| Region                                                                   | -0.277                                                       | 0.787 | 0.757   | -1.624*                                                     | 0.659 | 0.197   | -0.327                                                   | 0.534 | 0.720   | -0.434                                                    | 0.966 | 0.647   |
| Social class                                                             | -0.671                                                       | 0.395 | 0.511   | -0.210                                                      | 0.369 | 0.810   | 0.133                                                    | 0.274 | 1.142   | -1.294*                                                   | 0.646 | 0.274   |
| Educational level                                                        | -0.914                                                       | 0.276 | 0.823   | 0.017                                                       | 0.207 | 1.017   | 0.300                                                    | 0.193 | 1.350   | 0.058                                                     | 0.311 | 1.060   |
| Contact with the animal supply chain                                     | -0.088                                                       | 0.722 | 0.914   | 0.642                                                       | 0.560 | 1.902   | 1.334*                                                   | 0.564 | 3.799   | 2.550                                                     | 1.409 | 12.816  |
| Attitude toward using insects in animal feed                             | 6.602*                                                       | 1.556 | 737.2   | 2.781*                                                      | 0.714 | 16.133  | 1.737*                                                   | 0.508 | 5.684   | 2.573*                                                    | 0.947 | 13.107  |
| Perception of benefits associated with the use of insects in animal feed | -1.790*                                                      | 0.820 | 0.166   | 0.406                                                       | 0.607 | 1.501   | 0.793                                                    | 0.465 | 2.210   | 2.521*                                                    | 1.111 | 12.441  |
| Perception of risks associated with the use of insects in animal feed    | 0.232                                                        | 0.431 | 1.261   | -0.628                                                      | 0.432 | 0.533   | -0.334                                                   | 0.347 | 0.715   | -1.023                                                    | 0.744 | 0.359   |
| Concerns facing the introduction of insects in animal feed               | 1.438*                                                       | 0.518 | 4.215   | 0.311                                                       | 0.358 | 1.365   | -0.657*                                                  | 0.328 | 0.518   | 0.234                                                     | 0.630 | 1.264   |
| Constant                                                                 | 7.985                                                        | 2.907 | 2937    | 0.551                                                       | 2.247 | 1.736   | -3.810                                                   | 1.986 | 0.022   | 11.582                                                    | 5.306 | 1071    |

|                      |         |         |         |         |
|----------------------|---------|---------|---------|---------|
| Likelihood logarithm | -29.859 | -42.665 | -51.810 | -20.909 |
| Chi-square value     | 146.52  | 122.610 | 102.61  | 125.77  |

\* p < 0.05.

231

232

233           The socio-demographic characteristics gender and educational level did not impact on citizens' willingness-to-  
234 accept the use of insects to feed poultry, cattle, pig and fish. Older citizens were less willing-to-accept the use of insects  
235 to feed fish compared to the young citizens. Citizens who lived in the Midwest, Northeast and North of Brazil were less  
236 willing-to-accept the use of insect to feed cattle compared to those who lived in the South and Southeast. Citizens who  
237 reported a lower income were less willing-to-accept the use of insect to feed fish compared to those citizens who  
238 reported a higher income. Citizens who reported previous contact with pig' farms were more willing-to-accept the use  
239 of insects to feed pigs compared to citizens who had not reported previous contact. Citizens who had a positive attitude  
240 towards the use of insect to feed animals were more likely to accept the use of insects to feed poultry, pig, cattle, and  
241 fish compared to those who had a negative attitude. Citizens who perceived the benefits of using insect to feed animals  
242 were less willing-to-accept the use of insects to feed poultry compared to those who didn't perceive the benefits.  
243 Citizens who perceived the benefits of using insects to feed animals were more willing-to-accept the use of insect to  
244 feed fish compared to those who didn't perceive the benefits. Citizens who were more concerned about using insect to  
245 feed animals were more willing-to-accept the use of insects to feed poultry compared to those who were less concerned.  
246 Finally, citizens who were more concerned about using insects to feed animals were less willing-to-accept the use of  
247 insect to feed pigs compared to those who were less concerned.

248

#### 249 **4. Discussion and concluding comments**

250           In this study, we investigated the factors influencing citizens' willingness-to-accept the use of insects to feed  
251 poultry, cattle, pig and fish. Such factors include socio-demographic characteristics, citizens' attitudes towards the use  
252 of insect to feed animals, perceived benefits, perceived risks and perceived concerns about the use of insects to feed  
253 animals. Our results are novel in the context of Brazil, which contributes to the existing literature, because previous  
254 studies have shown that citizens' willingness to accept new food technologies, such as the use of insects to feed  
255 animals, depends on the country where the study is conducted (Da costa et al. 2000; Lusk, Roosen fox 2003; Kimenju  
256 and De Groote 2008; Vidigal et al., 2015).

257           Our results showed that citizens' willingness-to-accept the use of insects to feed poultry, pig, and fish was  
258 higher than the willingness to accept insects to feed cattle. Our results are in line with Verbeke et al. (2015), who also  
259 found that Belgium' citizens were more willing-to-accept the use of insects to feed fish and poultry than to feed cattle.  
260 A possible explanation for such result is that it is easy to accept that insects could be used to feed poultry and fish, since  
261 these species have access and might eat insects in their natural environment (Verbeke, et al., 2015). Such argument  
262 might be valid to explain the higher acceptance of the use of insects to feed poultry and fish compared to cattle, but not  
263 to explain the higher acceptance of the use of insects to feed pig than cattle. In the context of Brazil, a possible

264 explanation is that beef is more consumed than pig, and therefore citizens' are more willing-to-accept the use of insects  
265 to feed pig because they will not regularly consume it.

266 Results of the logistic regression models were slightly different, indicating that the factors influencing citizens'  
267 willing-to-accept the use of insects to feed animals depends on the specie (i.e. poultry, pig, cattle, and fish) that will be  
268 fed with insects. In general, socio-demographic characteristics seem not consistent to explain citizens' willing-to-accept  
269 the use of insects to feed animals, because none of the socio-demographic variables that we tested had a significant  
270 impact in all the four logistic models. Instead, age and income were significant in explain citizens' willingness to accept  
271 the use of insects to feed fish, with older and lower income citizens less willing-to-accept. This result might be  
272 explained because older individuals with lower income are more neophobic, being more prudent and seek for safer and  
273 known foods (Vidigal et al., 2015). The region where citizens live was significant in explain citizens' willingness-to-  
274 accept the use of insects to feed cattle. Citizens who live in the Midwest, Northeast and North regions of Brazil were  
275 less willing-to-accept the use of insects to feed cattle compared to those who live in the South and Southeast regions.  
276 This result might be explained by difference in cultures among these regions. Indeed, previous studies have shown that  
277 consumers' rejection of new food technologies depends on food taboos, which are usually acquired by sociocultural  
278 factors (Meyer-Rochow, 2009; Hartmann et al., 2015; Tan et al., 2015). For instance, exposure and social learning,  
279 impact on people's choices about what is appropriate to eat, and which foods they are supposed to like (Hartman et al.,  
280 2015). As South and Southeast regions of Brazil are more developed than Midwest, Northeast and North regions, it is  
281 reasonable to assume that citizens who live in South and Southeast have more information about new food technologies,  
282 as well as more contact to different types of food, which might keep them open-minded to the use of insects to feed  
283 animals. In addition, citizens who reported previous contact with pigs were more willing-to-accept the use of insects to  
284 feed pigs than those who did not report previous contact.

285 Results of the logistic models showed that citizens' attitude towards the use of insects to feed animals  
286 consistently explain citizens' willingness-to-accept the use of insects to feed animals, regardless of the specie fed. These  
287 results are in line with previous literature that found that individuals holding more positive attitudes were more willing  
288 to accept new food technologies (Van huis, 2013; Verbeke et al., 2015; Vidigal et al., 2015; Hartmann et al., 2015;  
289 Sogari et al., 2019). Such result is important, because personal attitudes related to the use of insects to feed animals  
290 might outweigh the adverse impact of perceived uncertainty and perceived concern related to it (Verbeke et al., 2015).

291 Results of the logistic models also showed that the perceived benefits impact on citizens' willingness-to-accept  
292 the use of insects to feed poultry and fish. Surprisingly, citizens who perceived the benefits of using insect to feed  
293 animals were less willing-to-accept the use of insect to feed poultry. This result is hard to explain. A possible  
294 explanation is that the use of insects as an alternative source of protein is novel and unfamiliar, so citizens may not have  
295 a clear picture of the possible benefits provided in the questionnaire. Indeed, according to Napier et al. (2004), most

296 consumers are unable to decide on the choice and be hesitant to accept new food technologies when it is associated with  
297 unclear benefits. In contrast, our results showed that citizens who perceived the benefits of using insect to feed animals  
298 were more willing-to-accept the use of insect to feed fish. These results are in line with those found in the literature  
299 showing that the more citizens perceive the benefits of a new product the higher is the willingness-to-accept it (Fisher,  
300 2009; Van Huis, 2013; Verbeke et al., 2015; Vidigal et al., 2015; Hartmann et al., 2015). Therefore, we recommend  
301 further studies exploring the role of perceived benefits on citizens' willingness to accept the use of insects to feed  
302 animals.

303 In our logistic regression models we also found that perceived concerns impact on citizens' willingness-to-  
304 accept the use of insects to feed poultry and pig. Again, results for poultry are difficult to interpret, because citizens who  
305 were more concerned about using insect to feed animals were more willing-to-accept the use of insects to feed poultry  
306 compared to those who were less concerned. A possible explanation is that individuals who are presented to unfamiliar  
307 food technologies might not understand it, causing some resistance and concerns (Vidigal et al., 2015). However,  
308 citizens who were more concerned about using insect to feed animals were less willing-to-accept the use of insects to  
309 feed pigs compared to those who were less concerned, which makes much more sense.

310 From a private and public policies perspective, our results provide insights that can be used to design strategies  
311 to increase the acceptance of the use of insects to feed poultry, cattle, pig, and fish. The strong and consistent impact of  
312 attitudes on citizens-willingness to accept highlights the importance of design strategies to disseminate the benefits of  
313 using insects to feed animals. For instance, we believe that important benefits to be disseminated by information  
314 campaigns are, for instance, 'the use of insects to feed animals decrease environmental impact of food production' and  
315 'the use of insects to feed animals increase animal productivity'. In addition, academia and industries should collaborate  
316 closely to develop more research and technology related to the use of insect to feed animals and the population should  
317 be engaged in this process, which might increase the willingness to accept this technology.

### 318 **Acknowledgements**

319 The authors would like to acknowledge the Coordination of Improvement of Higher Level Personnel –CAPES for the  
320 support. The second author thanks the National Council for Scientific and Technological Development – CNPq, Brazil,  
321 for the research grant number 305082/2018-3.

### 322 **References**

- 323 Alegretti, G., Talamini, E., Schmidt, V., Bogorni, P.C., Ortega, E., 2018. Insect as feed: An emergy assessment of insect  
324 meal as a sustainable protein source for the Brazilian poultry industry. *Journal of Cleaner Production*. 171, 403-412.
- 325 Da Costa, M.C., Deliza, R., Rosenthal, A., Hedderley, D., Frewer, L., 2000. Non-conventional technologies and impact  
326 on consumer behavior. *Trends in Food Science & Technology*. 11, 188-193.
- 327 Fisher, R.H.A., Frewer, F.L., 2009. Consumer familiarity with foods and the perception of risks and benefits. *Food*

- 328 Quality and Preference. 20, 576-585.
- 329 Gere, A., Székely, G., Kovács, S., Kókai, Z., Sipos, L., 2017. Readness to adopt insects in Hungary: A case study. Food  
330 quality and preference. 59, 81-86.
- 331 Hair J.F., Black W.C, Babin B.J., Anderson R.E., 2010. Multivariate Data Analysis; 7th ed. Prentice Hall, New Jersey.
- 332 Hartmann, C., Shi, J., Giusto, A., Siegrist, M., 2015. The psychology of eating insects: A cross-cultural comparison  
333 between Germany an China. Food Quality and Preference. 44, 148-156.
- 334 Kim, W.S., Less, F.J., Wang, L., Yan, T., Kiron, V., Kaushik, J.S., Lei, G.X., 2019. Meeting global feed protein  
335 demand: challenge, opportunity, and strategy. Annual Review of Animal Biosciences. 7, 17.1-17.23.
- 336 Kimenju, S. and De Groote, H., 2008. Consumer willingness to pay for genetically modified food in Kenya.  
337 Agricultural Economics. 38, 35-46.
- 338 Kline, R.B., 2011. Principles and Practice of Structural Equation Modeling. New York: The Guilford Press, 3-427.
- 339 Lusk, J.L., Roosen, J., Fox, J.A., 2003. Demand for beef from cattle administered growth hormones or fed genetically  
340 modified cord: a comparison of consumers in France, Germany, the United Kingdom and the United States. American  
341 Journal of Agricultural Economics. 85, 16-29.
- 342 Llagostera, P.F., Kallas, Z., Reig, L., Amores de Gea, D., 2019. The use of insect meal as a sustainable feeding  
343 alternative in aquaculture: Current situation, Spanish consumers' perception and willingness to pay. Journal of Cleaner  
344 Production. 229, 10-21.
- 345 Martins, Y., Pliner, P., 2005. Homan food choices: an examination of the factors underlying acceptance/rejection of  
346 novel and familiar animal and nonanimal food. Appetite. 45, 214-224.
- 347 Meyer-Rochow, V.B., 2009. Food taboos: their origins and purposes. Journal of Ethnobiology and Ethnomedicine. 5, 1-  
348 18.
- 349 Napier, T., Tucker, M., Henry, C., Whaley, S. 2004. Consumer attitudes toward GMOs. The Ohio experience. Journal  
350 of Food Science. 69, 69-76.
- 351 Rumpold, B.A. and Schluter, O.K., 2013a. Nutritional composition and safety aspects of edible insects. Molecular  
352 Nutrition & Food Research. 57, 802-823.
- 353 Sogari, G., Amato, M., Biasato, I., Chiesa, S., Gasco, L., 2019. The potential role of insects as feed: A multi-perspective  
354 review. Animals. 9, 119.
- 355 Tan, H.S.G., Fisher, A.R., Tinchan, P., Stieger, M., Steenbekkers, L.P.A., van Trijp, H. C., 2015. Insect as food:  
356 exploring cultural exposure and individual experience as determinants of acceptance. Food Quality and Preference. 42,  
357 78-89.
- 358 Tan, H.S.G., Fischer, A.R.H., van Trijp, H.C.M, Stieger, M., 2016. Tasty but nasty? Exploring the role of sensory-liking  
359 and food appropriateness in the willingness to eat unusual novel foods like insects. Food Quality and Preference. 48,



360 293-302.

361 Van Huis, A., 2013. Potential of insects as food and feed in assuring food security. *Annual Review of Entomology*. 58,  
362 563-583.

363 Van Huis, A., Van Itterbeeck, J., Klunder, H., Mertens, E., Halloran, A., Muir, G., Vantomme, P., 2013. Edible Insects:  
364 Future Prospects for Food and Feed Security. FAO Forestry Paper 171. FAO (Food and Agriculture Organization of the  
365 United Nations), Rome, Italy. [www.fao.org/docrep/018/i3253e/i3253e.pdf](http://www.fao.org/docrep/018/i3253e/i3253e.pdf)

366 Vanhonacker, F., Van Loo, E.J., Gellynck, X., Verbeke, W., 2013. Flemish consumer attitudes towards more  
367 sustainable food choices. *Appetite*. 62, 7-16.

368 Verbeke, W.T., Spranghers, P., De Clercq, S., De Smet, S., Sas, B., Eeckhout, M., 2015. Insects in animal feed:  
369 Acceptance and its determinants among farmers, agriculture sector stakeholders and citizens. *Animal Feed Science and*  
370 *Technology*. 204, 72-87.

371 Vidigal, M.C.T.R., Minim, V.P.R., Simiqueli, A.A., Souza, P.H.P., Balbino, D.F., Minim, L.A., 2015. Food  
372 Technology neophobia and consumer attitudes toward foods produced by new and conventional technologies: A case  
373 study in Brazil. *Food Science and Technology*. 60, 832-840.

374

375

376

377

378

379
